# Supplementary material
Source: publisher figshare collection journal article supplement (https://diabetesjournals.figshare.com/ndownloader/files/41477505)
Supplement: Supplementary file 1 [file 41477505]

# Supplementary material

## Content

|                                                                                                                                          |    |
|------------------------------------------------------------------------------------------------------------------------------------------|----|
| Supplementary material 1 – Skin Care Program .....                                                                                       | 2  |
| Supplementary material 2 - Flowchart .....                                                                                               | 4  |
| Supplementary tables.....                                                                                                                | 7  |
| Supplementary Table S1 – Insulin pump cohort including device types, prior experience, and skin problems .....                           | 7  |
| Supplementary Table S2 – Glucose sensor cohort including device types, prior experience and skin problems .....                          | 7  |
| Supplementary Table S3 – Confirmatory models for effect of intervention on primary outcome any eczema or wound.....                      | 8  |
| Supplementary Table S4 - Coefficients from Competing Cox Regression on time to eczema and wounds .....                                   | 8  |
| Supplementary Table S5 – Coefficients from GEE on effect of intervention on itching severity at pump and sensor sites .....              | 9  |
| Supplementary Table S6 – Coefficients from GEE for the influence of skin care program components on eczema or wound in full cohort ..... | 9  |
| Supplementary Table S7 – Coefficients from GEE for the influence of different products on later eczema or wound and itching .....        | 10 |
| Supplementary Table S8– Descriptive results on use of barriers, skin sites etcetera at first and last study visit .....                  | 11 |
| Supplementary Figures .....                                                                                                              | 12 |
| Supplementary Figure S1 – Consort flow diagram for inclusion process .....                                                               | 12 |
| Supplementary Figure S2 – Kaplan-Meier plots for eczema and wounds depending on group of intervention.....                               | 13 |
| Supplementary Figure S3 – Kaplan-Meier plots for eczema and wounds depending on former device use.....                                   | 14 |
| Supplementary Figure S4 – Grade of itching over time in two groups in two panels with device types: pump and sensor .....                | 15 |

# Skin Care Program

**As part of the research project:**

**Prospective Study of Dermatological Complications Associated with Continuous Subcutaneous In-sulin Infusion and/or Continuous Glucose Monitoring in Pediatric Patients with Type 1 Diabetes**

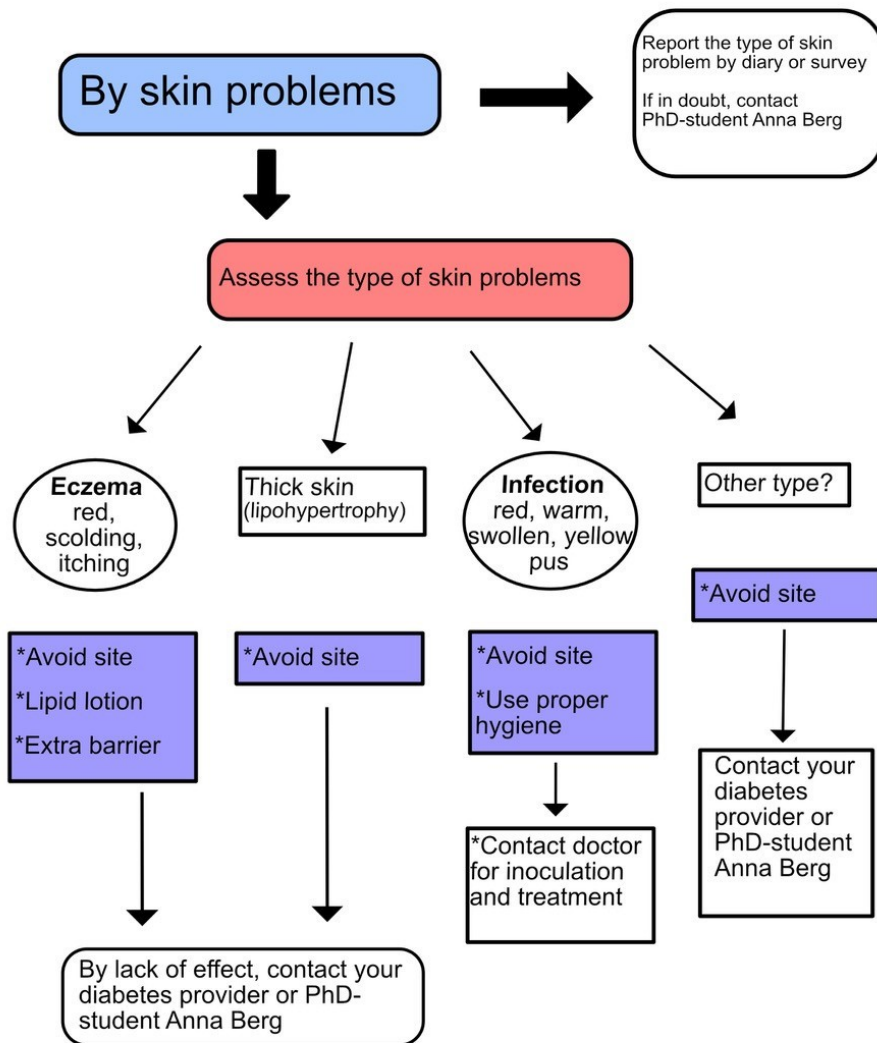

## Contact info:

MD and PhD-student Anna Korsgaard Berg

+45 22 39 35 90, [anna.korsgaard.berg@regionh.dk](mailto:anna.korsgaard.berg@regionh.dk)

MD and Associate Professor Jannet Svensson

+45 38 68 10 89, [jannet.svensson@regionh.dk](mailto:jannet.svensson@regionh.dk)

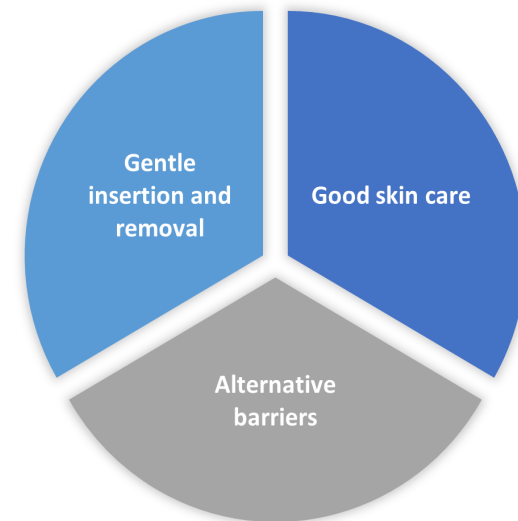

## Good skin care

Use unperfumed skin products and soap.

Use daily lipid lotion (the delivered Decubal Lipid 70%) on "pause sites" for the diabetes device. Pause sites are skin sites which are used for the device, although not currently.

## Gentle insertion and removal

Insertion:

1. Find a suitable site with intact skin
2. If necessary, remove hair gently
3. Clean the site with water and soap and let it air-dry
4. Insert the device carefully without pulling too much in the patches

Removal:

1. Firstly, loosen the sides of the patch
2. Thereafter, carefully pull the patch with a low angle to remove it
3. Finally, use Niltac or other removal agents to remove adhesive

## Alternative barriers

If there are problems due to too loose adhesion of the device, a protecting film (IV-3000) or tape (Mepore tape) can be put above to keep it secured, for instance also during sport or swimming.

If the skin is irritated or itchy, the following alternative barriers can be used either under or above the device between number 3 and 4 in insertion recommendations.

Liquid barrier that must dry before insertion: Welland WBF Wipe or Silesse Spray

Barrier film or thin patch: IV3000, Leukomed, Fixomull or tegaderm.

Thicker barrier patch: Duoderm or Compeed.

**Ask your diabetes provider about the products and get them delivered next time you are at the hospital.**

## Flowchart for developed skin problems – to health-care-professionals

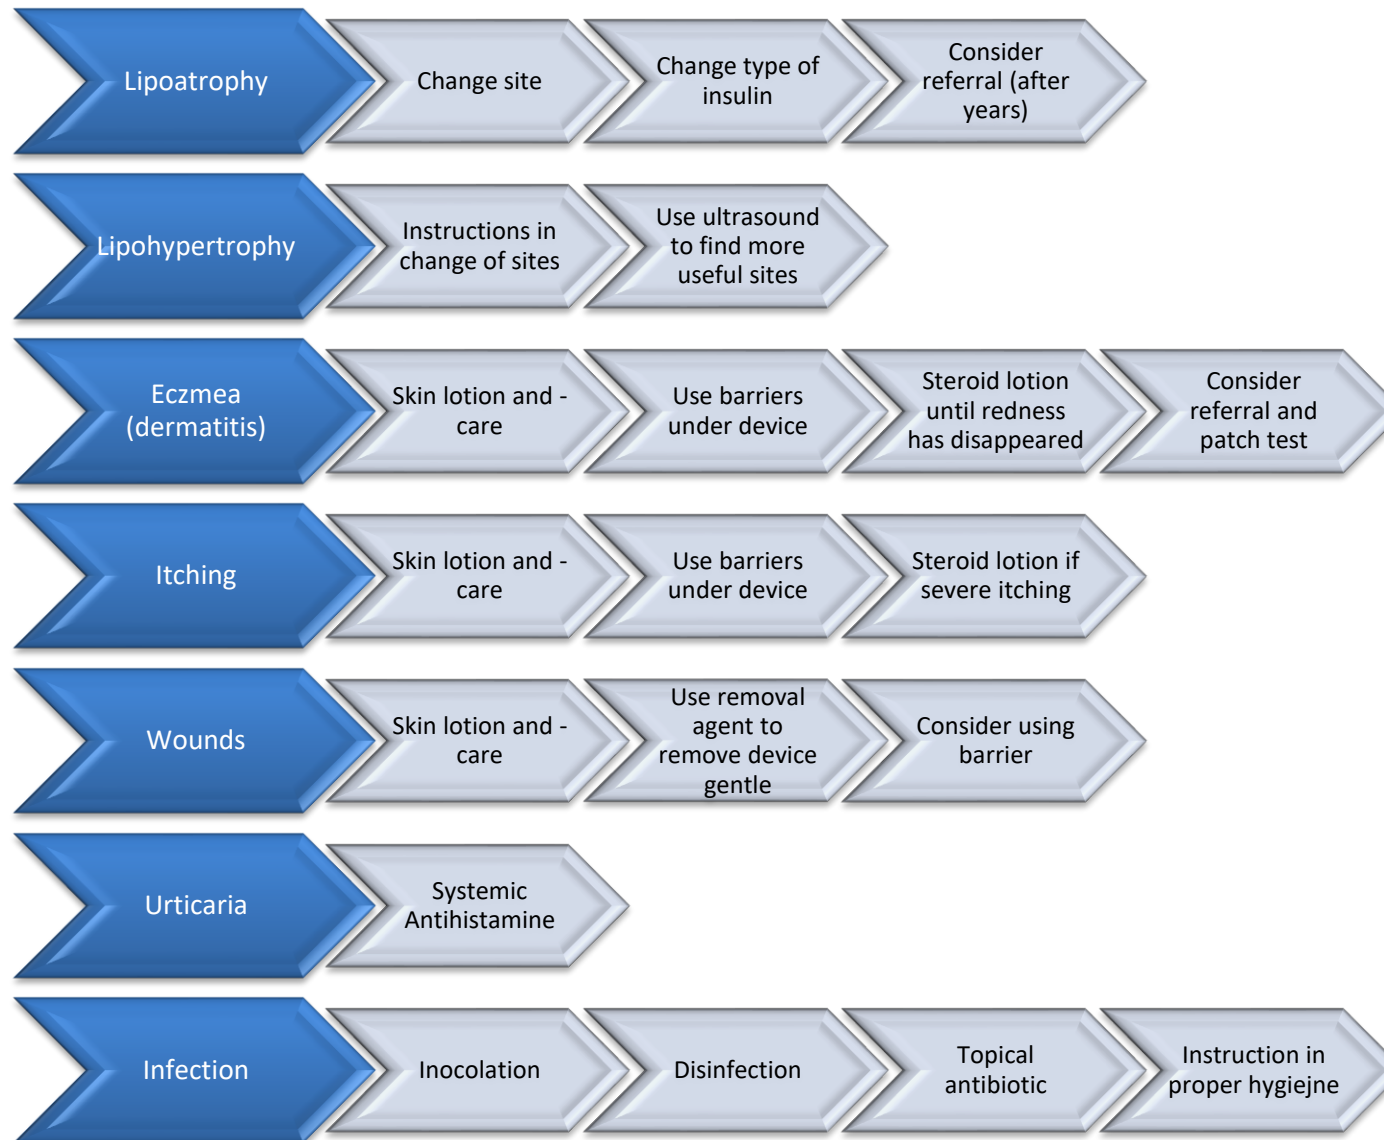

This is just an overview of possibilities and sequence of steps – **For all reactions, the site of reaction should be avoided** until proper healing and the **reaction should be reported as an adverse event** to the Danish Medicines Agency. The first steps will be continued.

## Lipoatrophy

### *Change site*

It is important that the affected site is not used anymore, and that more different skin sites are being used.

### *Change type of insulin*

Lipoatrophy is an immune reaction to insulin, and therefore changing the type of insulin may help. If there is a tendency for lipoatrophy by multiple types of insulin, quarterly change of insulin type may help.

### *Consider referral (after years)*

If many months or years' worth of attempts in changing the type of insulin have not resulted in remission of the site and it has cosmetic implications for the participant, lipofilling by referral to plastic surgeon can be considered.

## Lipohypertrophy

### *Instructions in change of sites*

Lipohypertrophy is caused by insulin's anabolic effect in the tissue, which influences insulin absorption. Therefore, these areas must be avoided. The reaction can be prevented by changing sites more often according to the manufacturer's recommendations.

### *Use ultrasound to find more useful sites*

If too few skin sites are known, ultrasound can be used to find more skin sites with sufficient depth of subcutis for devices.

## Eczema

### *Skin lotion and -care*

Proper skin care with use of clean, dry sites for infusion set, insulin pump or glucose sensor seem to have a positive influence on reactions. A lipid cream with up to 70% lipid can be placed on skin areas not currently being used for a device, aka 'the pause sites'.

### *Use barriers under device*

To avoid exposure of skin to the ingredients from the diabetes device, a barrier can be used underneath. The first step is a barrier lotion, spray or film. Failing that a patch can be used (IV-3000/Tegaderm/Mepitel). A punch a hole can be made in the patch for the catheter or filament to go through.

### *Steroid lotion until redness has disappeared*

Steroid lotion (type II or III) can be used to treat the current eczema by applying the lotion daily until the eczema-reaction disappears (max 4 weeks).

An alternative to steroid lotion is the use of fluticasone spray on skin, which has shown to be effective in studies on children and adolescents<sup>1</sup>.

---

<sup>1</sup> Paret et al. "Out of the box" solution for skin... *Acta Diabetol.* (2019)

January 2020

### *Consider referral and patch test*

If eczema continues to arise despite the above steps in more than 14 days, the participant should be referred to the dermatological department, Gentofte Hospital, with consideration of the need to perform patch testing.

## **Itching**

### *Skin lotion and -care*

See above

### *Use barriers under device*

See above

### *Steroid lotion if severe itching*

Steroid lotion as for eczema can be used daily in case of severe itching in a period with daily applying of steroid lotion although maximum in 4 weeks.

## **Wounds**

### *Skin lotion and -care*

See above

### *Use removal agent to remove device gentle*

Some wounds are caused by destruction of tissue by removal of former used diabetes devices and/or removal agents such as Niltac. Oil, or similar products can be used to support more gentle removal.

### *Consider using barrier*

Wounds can be caused by too strong adhesion that disrupts the skin barrier. If so, a barrier under the Eczema area can be used to protect the skin from the strong adhesive.

## **Infection**

### *Inoculation*

Inoculation of the area including a test of antibiotic resistance

### *Disinfection*

Clearance of infection by use of disinfection with, for instance, hibiscrub on the area.

### *Topical antibiotic*

If lack of effect by clearance, topical antibiotics can be used after the test of antibiotic resistance

### *Instruction in proper hygiene*

Proper hygiene can prevent further infections.

## **Contact info**

MD and PhD student Anna Korsgaard Berg  
[anna.korsgaard.berg@regionh.dk](mailto:anna.korsgaard.berg@regionh.dk)

## Supplementary tables

Supplementary Table S1 – Insulin pump cohort including device types, prior experience, and skin problems

|                                         | Control<br>(N=40) | Intervention<br>(N=57) | Overall<br>(N=97) |
|-----------------------------------------|-------------------|------------------------|-------------------|
| Type of initiated insulin pump          |                   |                        |                   |
| Medtronic 670G                          | 2 (5.0%)          | 10 (17.5%)             | 12 (12.4%)        |
| Medtronic 780G                          | 5 (12.5%)         | 6 (10.5%)              | 11 (11.3%)        |
| Omnipod                                 | 21 (52.5%)        | 15 (26.3%)             | 36 (37.1%)        |
| Tandem                                  | 12 (30.0%)        | 18 (31.6%)             | 30 (30.9%)        |
| Medtrum                                 | 0 (0%)            | 8 (14.0%)              | 8 (8.2%)          |
| Former use of insulin pump              |                   |                        |                   |
| Yes                                     | 11 (27.5%)        | 26 (45.6%)             | 37 (38.1%)        |
| No                                      | 29 (72.5%)        | 31 (54.4%)             | 60 (61.9%)        |
| Skin problems with earlier insulin pump |                   |                        |                   |
| Yes                                     | 7 (17.5%)         | 19 (33.3%)             | 26 (26.8%)        |
| No                                      | 4 (10.0%)         | 7 (12.3%)              | 11 (11.3%)        |
| Missing                                 | 29 (72.5%)        | 31 (54.4%)             | 60 (61.9%)        |

Supplementary Table S2 – Glucose sensor cohort including device types, prior experience and skin problems

|                                           | Control<br>(N=37) | Intervention<br>(N=110) | Overall<br>(N=147) |
|-------------------------------------------|-------------------|-------------------------|--------------------|
| Type of initiated glucose sensor          |                   |                         |                    |
| Dexcom G6                                 | 11 (29.7%)        | 32 (29.1%)              | 43 (29.3%)         |
| Libre                                     | 21 (56.8%)        | 57 (51.8%)              | 78 (53.1%)         |
| Medtronic sensor                          | 5 (13.5%)         | 14 (12.7%)              | 19 (12.9%)         |
| Glucomen Day                              | 0 (0%)            | 2 (1.8%)                | 2 (1.4%)           |
| Medtrum sensor                            | 0 (0%)            | 5 (4.5%)                | 5 (3.4%)           |
| Former use of glucose sensor              |                   |                         |                    |
| No                                        | 21 (56.8%)        | 57 (51.8%)              | 78 (53.1%)         |
| Yes                                       | 16 (43.2%)        | 53 (48.2%)              | 69 (46.9%)         |
| Skin problems with earlier glucose sensor |                   |                         |                    |
| No                                        | 7 (18.9%)         | 16 (14.5%)              | 23 (15.6%)         |
| Yes                                       | 9 (24.3%)         | 26 (23.6%)              | 35 (23.8%)         |
| Missing                                   | 21 (56.8%)        | 68 (61.8%)              | 89 (60.5%)         |

**Supplementary Table S3 – Confirmatory models for effect of intervention on primary outcome any eczema or wound**

|                | Cox regression models† |         |
|----------------|------------------------|---------|
|                | HR [95%CI]             | p-value |
| Univariate     | 0.77 [0.47-1.28]       | 0.313   |
| Multivariable§ | 0.83 [0.50-1.39]       | 0.478   |

Abbreviations:

† All coefficients in table are shown as effect of intervention (skin care program) on presence of eczema or wound from cox regression and is presented as Hazard ratio (HR) with [95%CI]. Besides exact p-values are presented.

§ Multivariable analysis are corrected for: atopic disease, age, sex in full group, former pump and sensor use, days since initiation of pump or sensor and atopic disease.

**Supplementary Table S4 - Coefficients from Competing Cox Regression on time to eczema and wounds**

|                                 |                 | Time to Eczema   |                                   | Time to Wound    |                                   |
|---------------------------------|-----------------|------------------|-----------------------------------|------------------|-----------------------------------|
|                                 | Effect of group | HR [95% CI]      | p-value (p <sub>corrected</sub> ) | HR [95% CI]      | p-value (p <sub>corrected</sub> ) |
| Full cohort (N = 171)           | Univariate      | 0.85 [0.46-1.55] | 0.590 (1.000)                     | 0.38 [0.18-0.80] | 0.010 (0.080)                     |
|                                 | Multivariable†  | 0.89 [0.47-1.70] | 0.730 (1.000)                     | 0.37 [0.17-0.77] | 0.008 (0.080)                     |
| Insulin pump cohort (N = 93)    | Univariate      | 0.87 [0.38-2.03] | 0.750 (1.000)                     | 0.55 [0.21-1.41] | 0.210 (0.560)                     |
|                                 | Multivariable§  | 1.02 [0.40-2.59] | 0.970 (1.000)                     | 0.43 [0.14-1.30] | 0.140 (0.448)                     |
| Glucose sensor cohort (N = 137) | Univariate      | 0.59 [0.27-1.27] | 0.180 (1.000)                     | 0.36 [0.13-1.01] | 0.053 (0.212)                     |
|                                 | Multivariable§  | 0.70 [0.29-1.64] | 0.410 (1.000)                     | 0.35 [0.12-1.00] | 0.050 (0.212)                     |

Coefficients from competing risk cox regression taking the risk of the other outcome (respectively eczema and wound) into account.

† Multivariable analysis is adjusted for: age, sex in both models and for atopic disease in eczema-specific model.

§ Multivariable analyses are adjusted for age, sex, former use of device in both models and for atopic disease in eczema-specific model



**Supplementary Table S5 – Coefficients from GEE on effect of intervention on itching severity at pump and sensor sites.**

|                                 |          | OR [95% CI]        | P-value |
|---------------------------------|----------|--------------------|---------|
| Insulin pump cohort (n = 65)    | Model A† | 0.76 [0.38-1.54]   | 0.4503  |
|                                 | Model B§ | 0.76 [0.36-576.93] | 0.4548  |
| Glucose sensor cohort (n = 114) | Model A† | 0.69 [0.37-1.28]   | 0.2390  |
|                                 | Model B§ | 0.69 [0.37-475.75] | 0.2298  |

†Model A is only adjusted for baseline itch level at respectively site of insulin pump or glucose sensor

§Model B is adjusted for former device use, atopic disease, and baseline itch level at respectively site of insulin pump or glucose sensor

**Supplementary Table S6 – Coefficients from GEE for the influence of skin care program components on eczema or wound in full cohort**

|                                      | Eczema (GEE)     |         | Wound (GEE)      |         |
|--------------------------------------|------------------|---------|------------------|---------|
|                                      | OR [95%CI] †     | p-value | OR [95%CI] †     | p-value |
| Use of disinfection                  | 0.62 [0.42-0.92] | 0.017   | 0.69 [0.41-1.17] | 0.170   |
| Use of lipid cream (reference never) |                  |         |                  |         |
| Seldom                               | 0.63 [0.33-1.22] | 0.168   | 1.21 [1.00-1.45] | 0.044   |
| Often                                | 0.88 [0.47-1.63] | 0.686   | 0.81 [0.62-1.05] | 0.105   |
| Always                               | 0.72 [0.38-1.35] | 0.304   | 0.60 [0.32-1.10] | 0.099   |
| Use of removal                       | 0.79 [0.42-1.46] | 0.445   | 0.98 [0.62-1.56] | 0.935   |

Abbreviations: GEE; Generalized Estimating Equations

† Coefficients are shown as the per protocol effect of different explanatory variables in rows with Odds Ratio (OR) with 95% confidence interval for OR in brackets [] and exact p-values. The GEE-models here are univariate

**Supplementary Table S7 – Coefficients from GEE for the influence of different products on later eczema or wound and itching.**

|               |                                      | Eczema or Wound (GEE) |         | Itching (GEE)    |         |
|---------------|--------------------------------------|-----------------------|---------|------------------|---------|
|               |                                      | OR [95%CI] †          | p-value | OR [95%CI]†      | p-value |
| Pump cohort   | Use of disinfection                  | 0.73 [0.31-1.73]      | 0.476   | 1.39 [0.87-2.25] | 0.172   |
|               | Use of lipid cream (reference never) |                       |         |                  |         |
|               | Seldom                               | 0.59 [0.18-1.88]      | 0.369   | 0.46 [0.21-0.98] | 0.043   |
|               | Often                                | 0.61 [0.20-1.83]      | 0.380   | 0.45 [0.21-0.97] | 0.042   |
|               | Always                               | 0.84 [0.29-2.39]      | 0.740   | 0.40 [0.20-0.81] | 0.011   |
|               | Use of removal                       | 0.79 [0.26-2.40]      | 0.680   | 0.97 [0.96-0.99] | 0.002   |
|               | Number of pump sites                 | 0.78 [0.55-1.12]      | 0.185   | 0.99 [0.83-1.18] | 0.910   |
|               | Use of liquid barrier                | 0.66 [0.23-1.86]      | 0.428   | 1.08 [0.62-1.87] | 0.795   |
|               | Use of patch under                   | 0.96 [0.19-4.83]      | 0.963   | 0.27 [0.12-0.62] | 0.002   |
|               | Use of patch over                    | 0.92 [0.25-3.40]      | 0.906   | 1.03 [0.23-4.63] | 0.968   |
| Sensor cohort | Use of disinfection                  | 1.08 [0.51-2.26]      | 0.848   | 0.96 [0.58-1.58] | 0.870   |
|               | Use of lipid cream (reference never) |                       |         |                  |         |
|               | Seldom                               | 0.21 [0.06-0.80]      | 0.022   | 0.92 [0.33-2.6]  | 0.879   |
|               | Often                                | 0.50 [0.18-1.38]      | 0.180   | 0.50 [0.21-1.21] | 0.125   |
|               | Always                               | 0.38 [0.14-1.06]      | 0.065   | 0.51 [0.21-1.26] | 0.144   |
|               | Use of removal                       | 0.59 [0.18-1.93]      | 0.381   | 1.06 [0.7-1.62]  | 0.773   |
|               | Number of sensor sites               | 0.66 [0.45-0.97]      | 0.036   | 0.32 [0.17-0.59] | <0.001  |
|               | Use of liquid barrier                | 0.52 [0.21-1.29]      | 0.159   | 0.50 [0.28-0.88] | 0.017   |
|               | Use of patch under                   | 1.57 [0.44-5.58]      | 0.482   | 0.99 [0.47-2.05] | 0.968   |
|               | Use of patch over                    | 0.79 [0.35-1.77]      | 0.563   | 1.25 [0.66-2.36] | 0.496   |

Abbreviations: GEE; Generalized Estimating Equations

† Coefficients are shown as the per protocol effect of different explanatory variables in rows with Odds Ratio (OR) with 95% confidence interval for OR in brackets [] and exact p-values from a univariate model.

**Supplementary Table S8– Descriptive results on use of barriers, skin sites etcetera at first and last study visit**

| Insulin pump cohort                             | Intervention        |                      | Control            |                      |
|-------------------------------------------------|---------------------|----------------------|--------------------|----------------------|
|                                                 | Baseline<br>(N=49)  | Last visit<br>(N=48) | Baseline<br>(N=34) | Last visit<br>(N=39) |
| Used skin sites for insertion of insulin pump   |                     |                      |                    |                      |
| 2 sites                                         | 36 (73.5%)          | 40 (83.3%)           | 22 (64.7%)         | 24 (61.5%)           |
| 3–4 sites                                       | 2 (4.1%)            | 5 (10.4%)            | 8 (23.5%)          | 11 (28.2%)           |
| >4 sites                                        | 2 (4.1%)            | 1 (2.1%)             | 0 (0%)             | 4 (10.3%)            |
| Missing                                         | 9 (18.4%)           | 2 (4.2%)             | 4 (11.8%)          | 0 (0%)               |
| Liquid barrier under infusions set/insulin pump |                     |                      |                    |                      |
| Yes                                             | 9 (18.4%)           | 16 (33.3%)           | 6 (17.6%)          | 17 (43.6%)           |
| No                                              | 40 (81.6%)          | 32 (66.7%)           | 27 (79.4%)         | 22 (56.4%)           |
| Missing                                         | 0 (0%)              | 0 (0%)               | 1 (2.9%)           | 0 (0%)               |
| Patch under insulin pump                        |                     |                      |                    |                      |
| Yes                                             | 3 (6.1%)            | 7 (14.6%)            | 5 (14.7%)          | 4 (10.3%)            |
| No                                              | 32 (65.3%)          | 30 (62.5%)           | 25 (73.5%)         | 29 (74.4%)           |
| Missing                                         | 14 (28.6%)          | 11 (22.9%)           | 4 (11.8%)          | 6 (15.4%)            |
| Extra patch above insulin pump                  |                     |                      |                    |                      |
| Yes                                             | 4 (8.2%)            | 0 (0%)               | 1 (2.9%)           | 2 (5.1%)             |
| No                                              | 31 (63.3%)          | 37 (77.1%)           | 29 (85.3%)         | 31 (79.5%)           |
| Missing                                         | 14 (28.6%)          | 11 (22.9%)           | 4 (11.8%)          | 6 (15.4%)            |
| Glucose sensor cohort                           | Intervention        |                      | Control            |                      |
|                                                 | Baseline<br>(N=111) | Last visit<br>(N=94) | Baseline<br>(N=38) | Last visit<br>(N=38) |
| Used skin sites for insertion of glucose sensor |                     |                      |                    |                      |
| 2 sites                                         | 88 (79.3%)          | 83 (88.3%)           | 29 (76.3%)         | 34 (89.5%)           |
| 3–4 sites                                       | 3 (2.7%)            | 3 (3.2%)             | 0 (0%)             | 1 (2.6%)             |
| >4 sites                                        | 1 (0.9%)            | 2 (2.1%)             | 0 (0%)             | 1 (2.6%)             |
| Missing                                         | 19 (17.1%)          | 6 (6.4%)             | 9 (23.7%)          | 2 (5.3%)             |
| Liquid barrier under glucose sensor             |                     |                      |                    |                      |
| Yes                                             | 17 (15.3%)          | 19 (20.2%)           | 1 (2.6%)           | 17 (44.7%)           |
| No                                              | 87 (78.4%)          | 74 (78.7%)           | 33 (86.8%)         | 21 (55.3%)           |
| Missing                                         | 7 (6.3%)            | 1 (1.1%)             | 4 (10.5%)          | 0 (0%)               |
| Patch under glucose sensor                      |                     |                      |                    |                      |
| Yes                                             | 6 (5.4%)            | 7 (7.4%)             | 2 (5.3%)           | 1 (2.6%)             |
| No                                              | 81 (73.0%)          | 53 (56.4%)           | 26 (68.4%)         | 30 (78.9%)           |
| Missing                                         | 24 (21.6%)          | 34 (36.2%)           | 10 (26.3%)         | 7 (18.4%)            |
| Extra patch above glucose sensor                |                     |                      |                    |                      |
| Yes                                             | 24 (21.6%)          | 14 (14.9%)           | 13 (34.2%)         | 9 (23.7%)            |
| No                                              | 63 (56.8%)          | 46 (48.9%)           | 15 (39.5%)         | 22 (57.9%)           |
| Missing                                         | 24 (21.6%)          | 34 (36.2%)           | 10 (26.3%)         | 7 (18.4%)            |

## Supplementary Figures

### Supplementary Figure S1 – Consort flow diagram for inclusion process

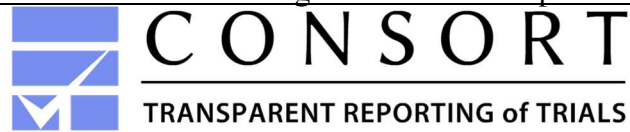

#### CONSORT 2010 Flow Diagram

##### Cluster-Controlled Study Design

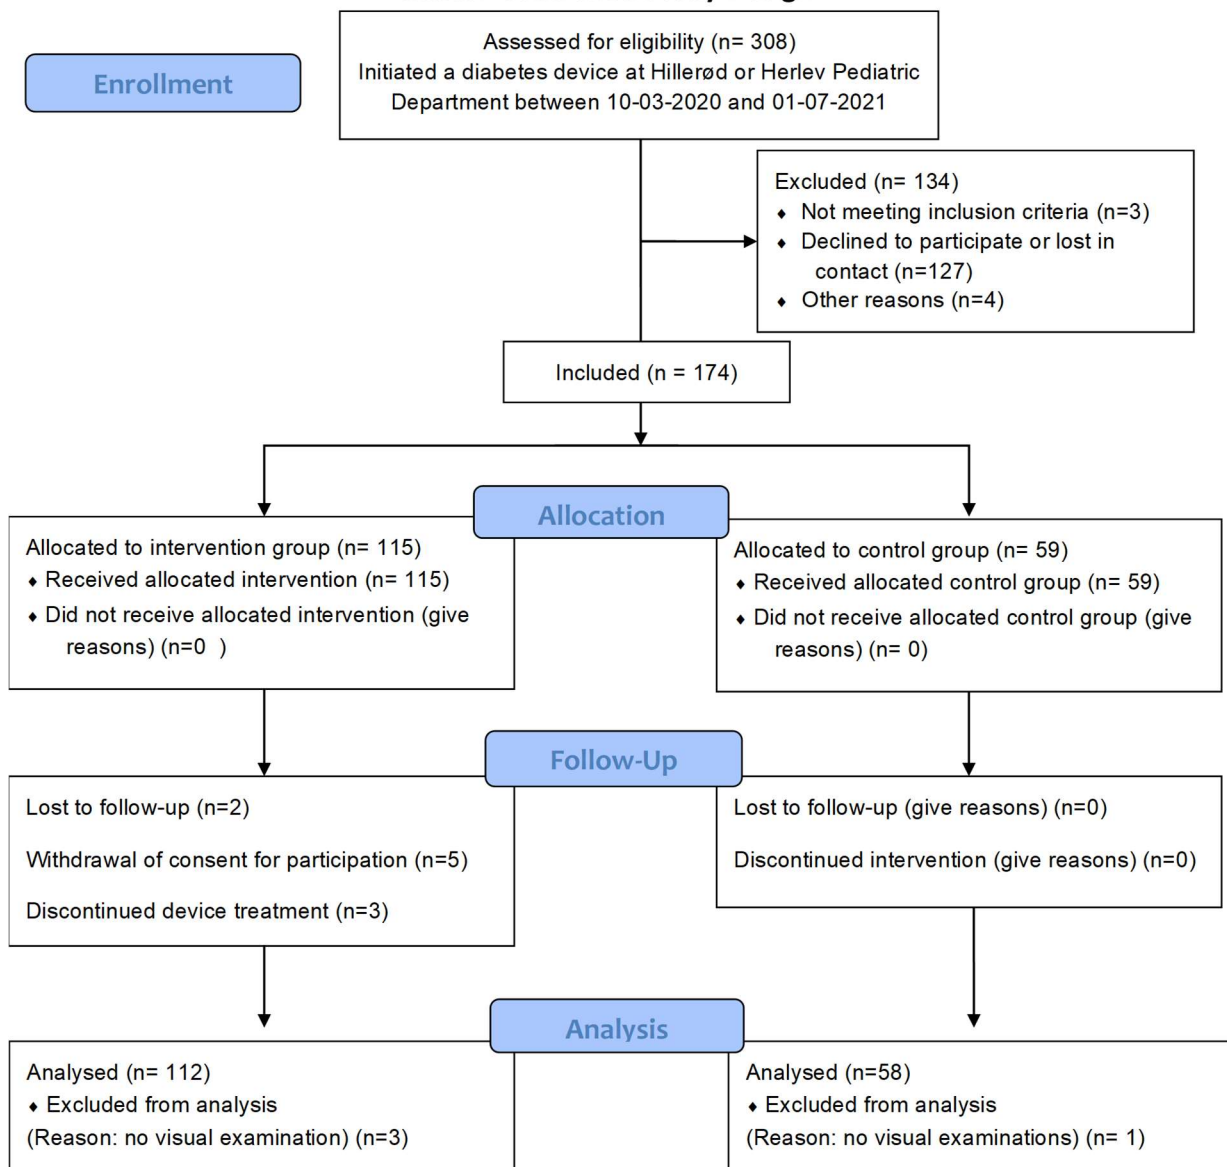

Supplementary Figure S2 – Kaplan-Meier plots for eczema and wounds depending on group of intervention

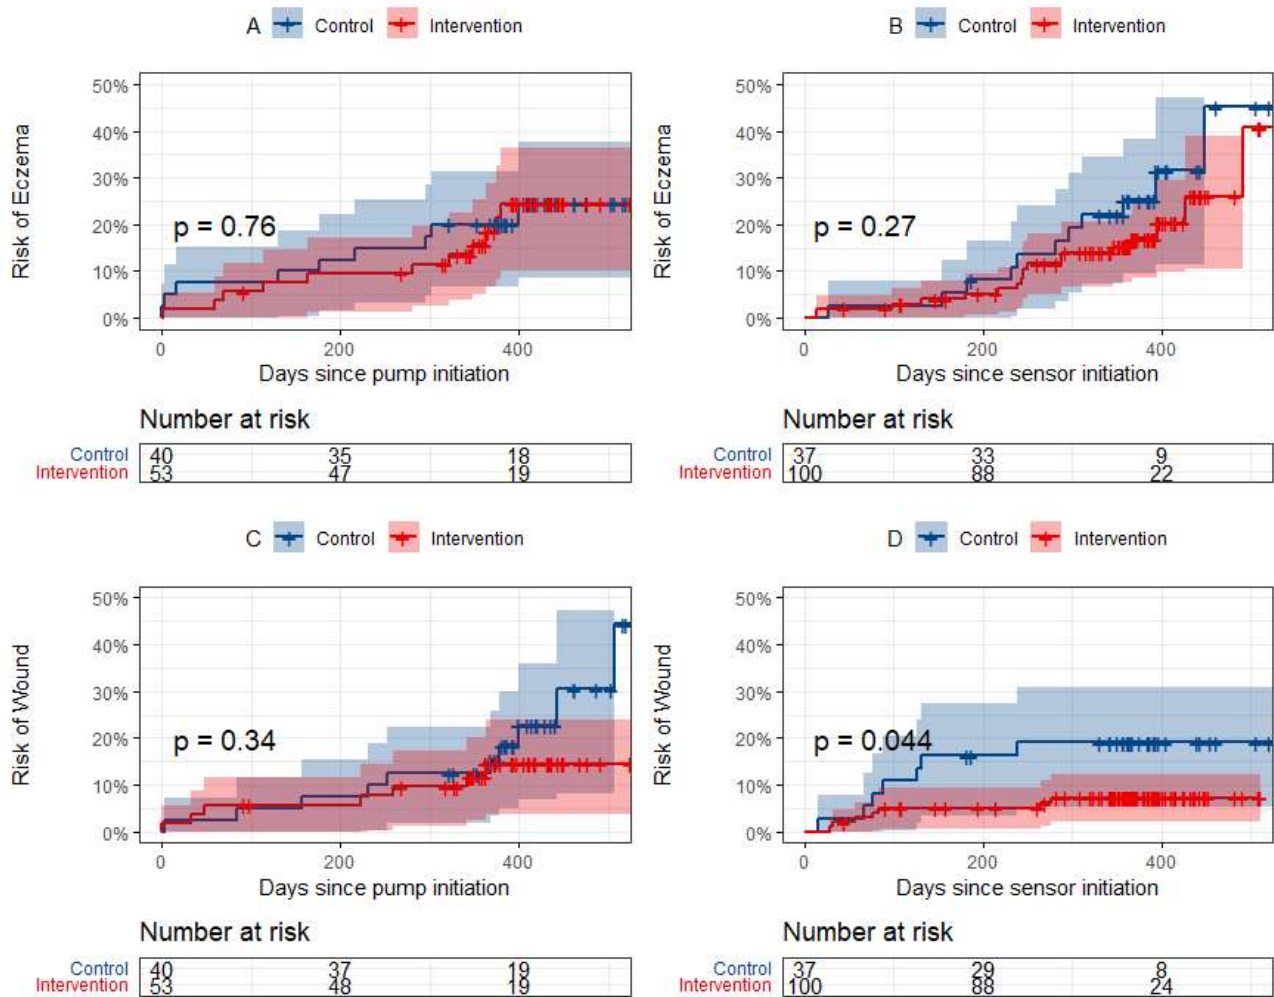

Kaplan-Meier plots for risk of eczema or wound for respectively pump and sensor starters stratified by intervention or control group. The p-value on the diagram is from the log-rank test.

Supplementary Figure S3 – Kaplan-Meier plots for eczema and wounds depending on former device use

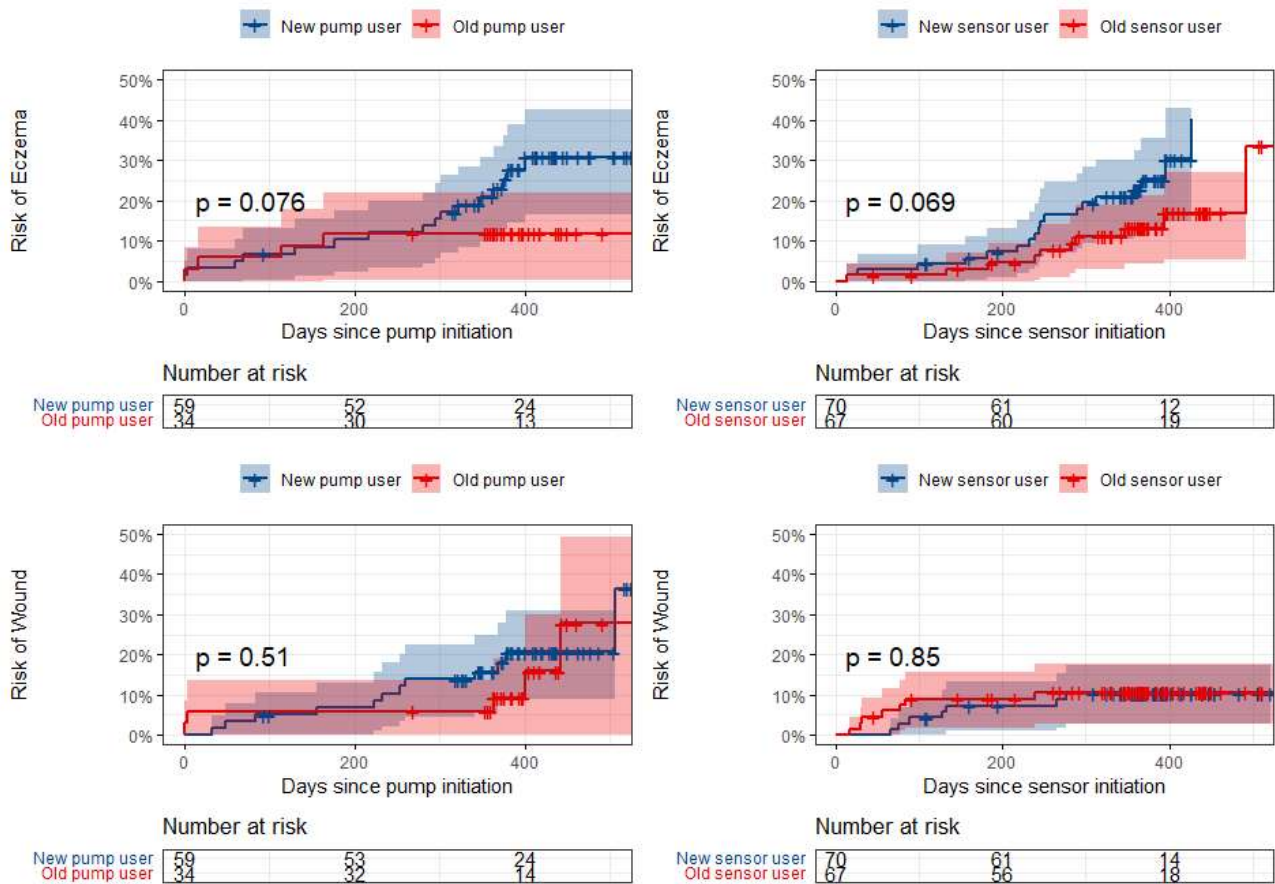

Kaplan-Meier plots for risk of eczema or wound for respectively pump and sensor starters stratified by experience of device use prior to initiation of this device. The p-value on the diagram is from the log-rank test.

Supplementary Figure S4 – Grade of itching over time in two groups in two panels with device types: pump and sensor

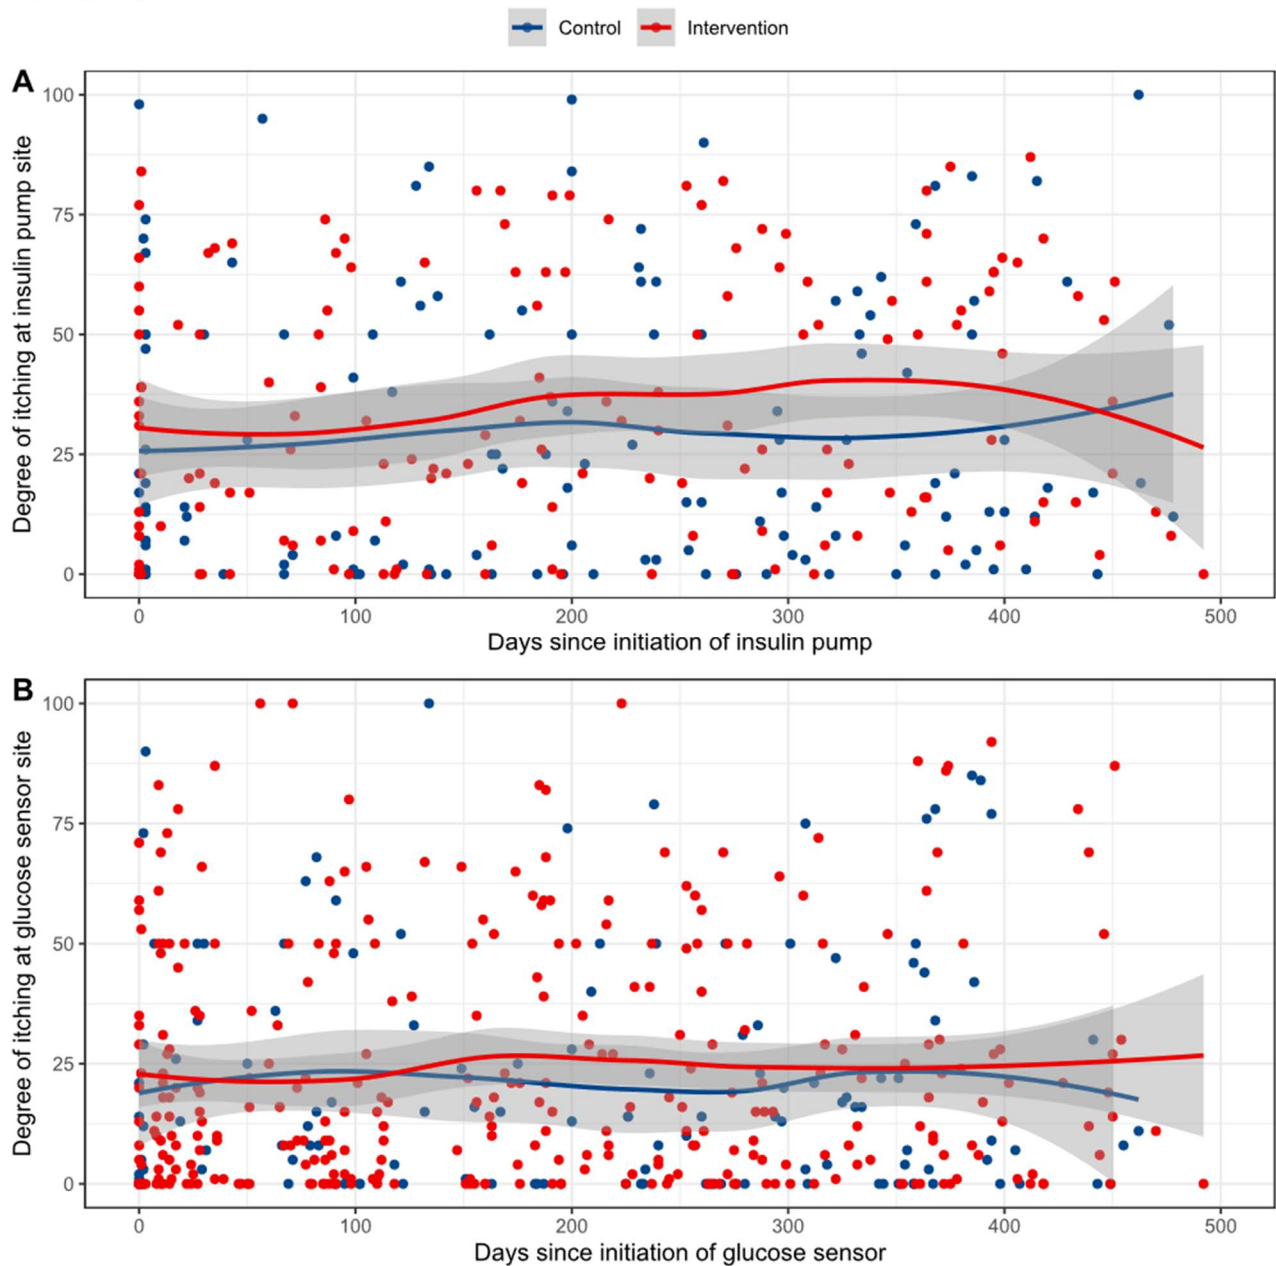

The y-axis represents the degree of itching on a VAS-scale from 0-100, the x-axis represents the exact number of days since initiation of device, and each dot represent one measure of itching and its respectively day. The smooth curves (made with “loess” function in R) show the average and tendencies for direction and correlation including 95% confidence levels in shaded gray. Panel A show itching at insulin pump sites for all participants in insulin pump cohort and panel B show itching at glucose sensor sites for all participants in glucose sensor cohort.
